## Correction to: RNA-Chrom: a manually curated analytical database of RNA–chromatin interactome

This is a correction to: G K Ryabykh and others, RNA-Chrom: a manually curated analytical database of RNA–chromatin interactome, *Database*, Volume 2023, 2023, baad025, <https://doi.org/10.1093/database/baad025>

In the originally published version of this manuscript, the wrong files were published under two links for **Supplementary Data**. The correct files have now been supplied for both these links in the article.
